# Supplementary material for: Honeycomb-like hollow carbon loaded with ruthenium nanoparticles as high-performance HER electrocatalysts
Source: Royal Society of Chemistry journal article supplement (doi:10.1039/d3se01343j), 2023-11-14
Supplement: d3se01343j1.pdf [file d3se01343j1.pdf]

*Supporting information*

**Honeycomb-like hollow carbon loaded ruthenium nanoparticles as high-performance HER electrocatalysts**

Peng-Cheng Ji, Yang Teng, Hong-Cheng Li, Ming-Yun Guan, Hai-Lang Jia\*

School of Chemistry and Chemical Engineering, Institute of Advanced Functional Materials for Energy, Analysis and Testing Center of Jiangsu University of Technology, Jiangsu University of Technology, Changzhou 213001, P. R. China.

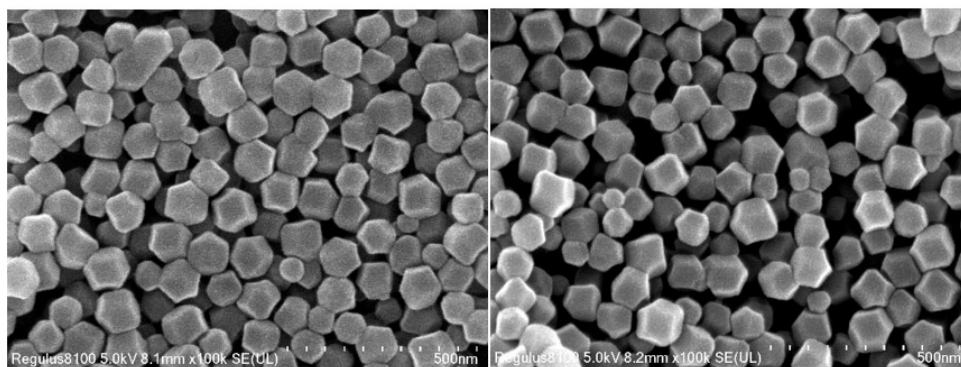

**Fig. S1** SEM of ZIF8

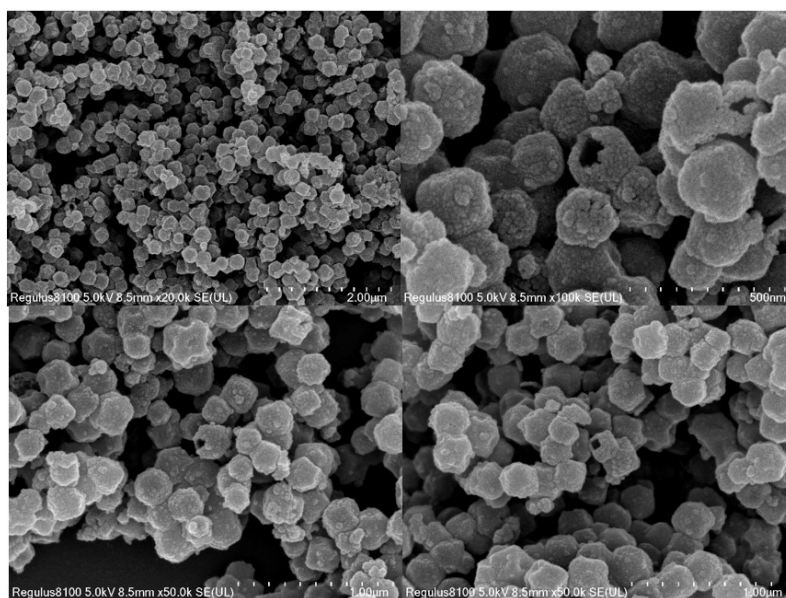

**Fig. S2** SEM of ZIF8 obtained by direct etching

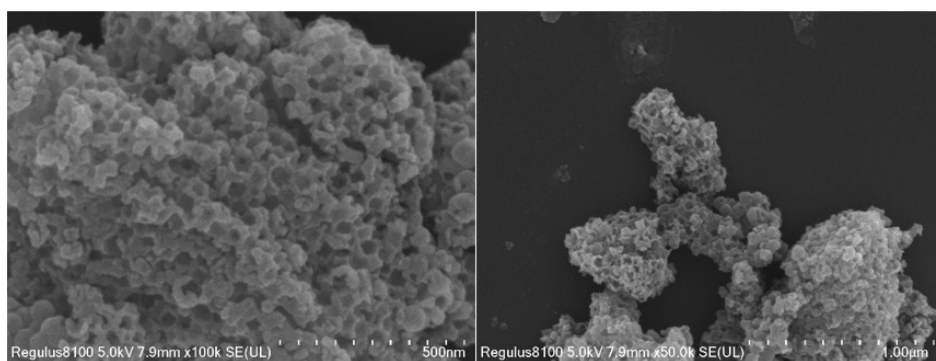

**Fig. S3** SEM of H-ZIF8

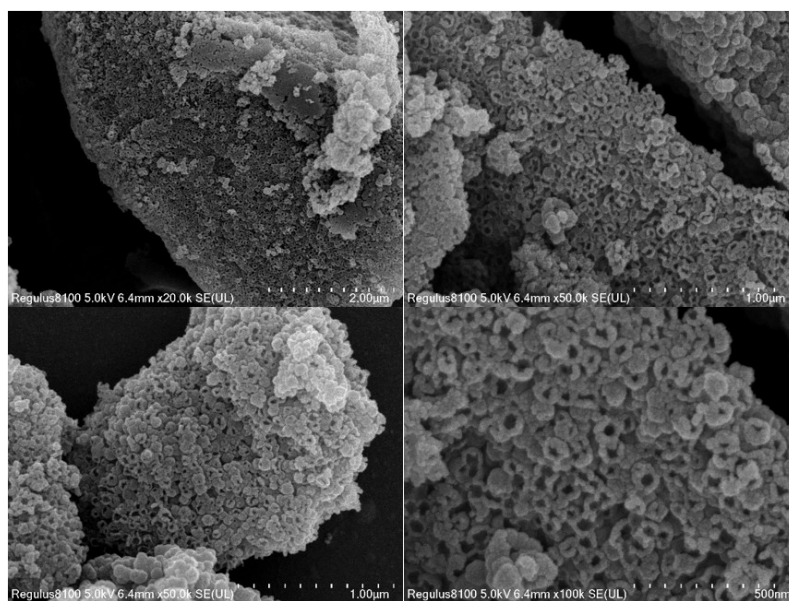

**Fig. S4** SEM of Ru/HNC

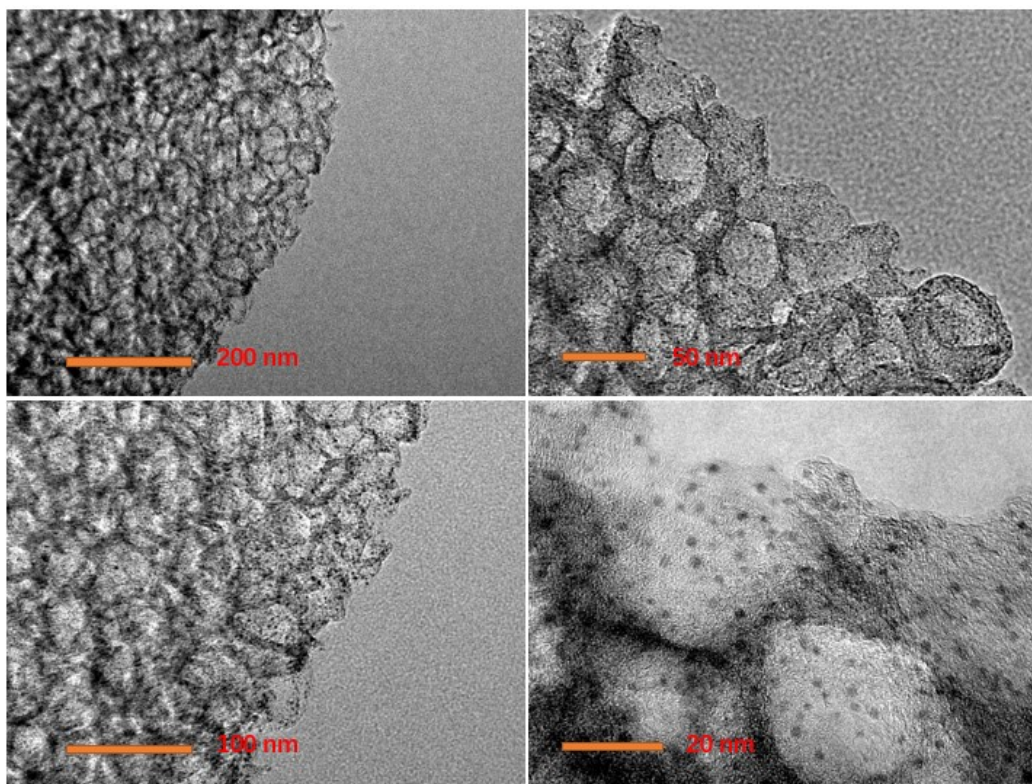

**Fig. S5** TEM of Ru/HNC

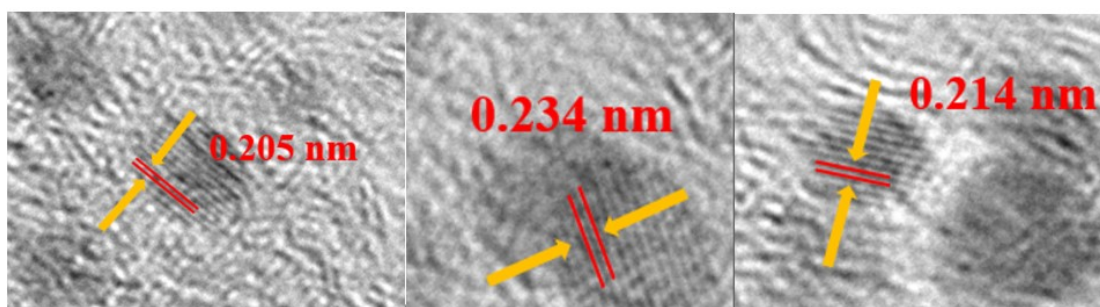

**Fig. S6** HR-TEM of Ru/HNC

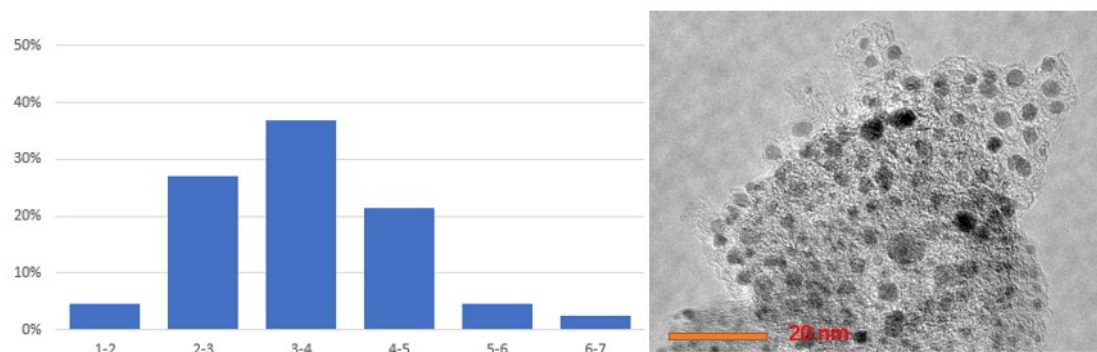

**Fig. S7** Particle size distribution of Ru/HNC

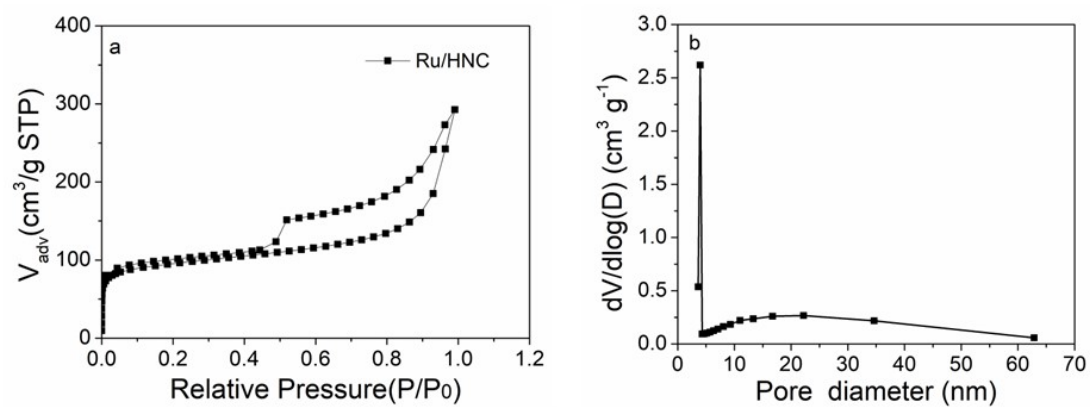

**Fig. S8** (a)  $N_2$  adsorption-desorption isotherms of Ru/HNC, (b) the pore size distribution of Ru/HNC.

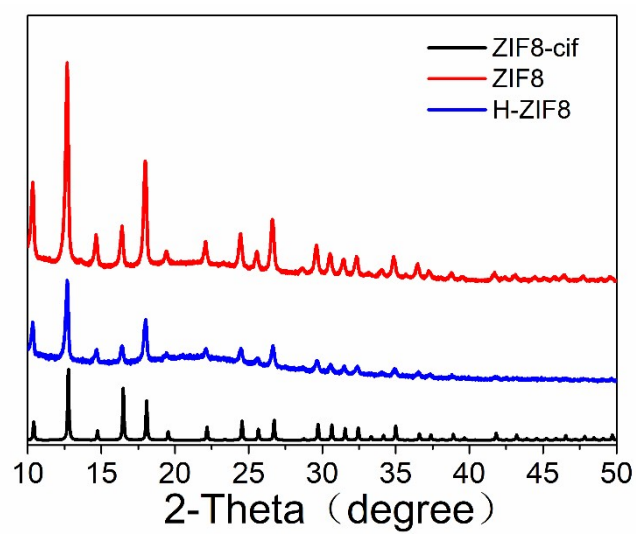

**Fig. S9** XRD of ZIF8-cif, ZIF8 and H-ZIF8

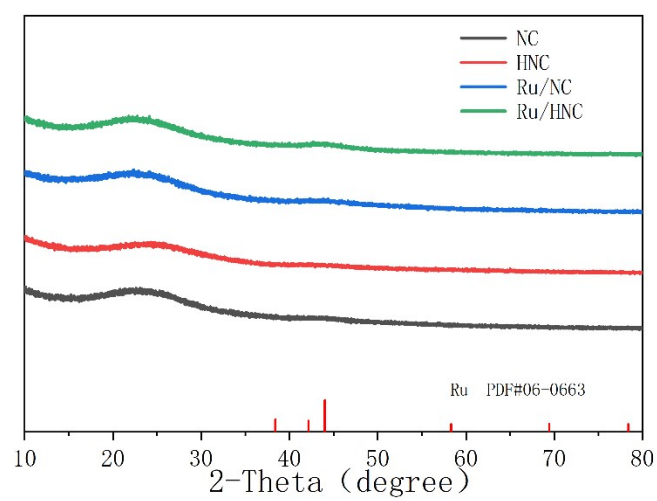

**Fig. S10** XRD of NC, HNC, Ru/NC, Ru/HNC

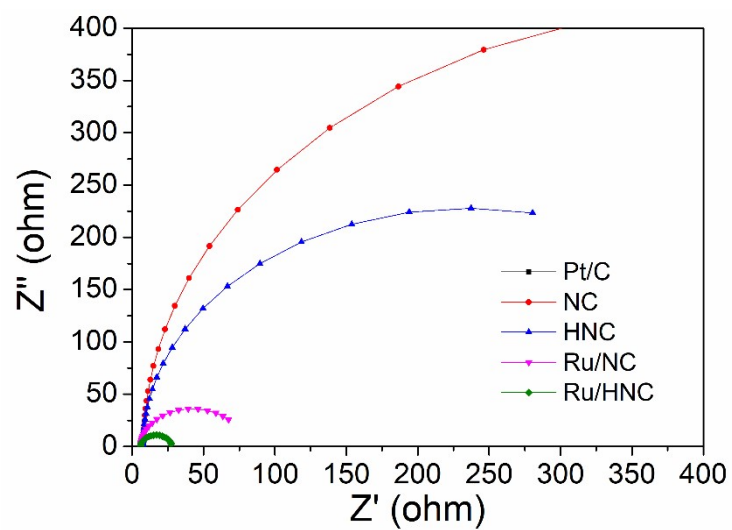

**Fig. S11** EIS of NC, HNC, Ru/NC, Ru/HNC in 0.5 M  $\text{H}_2\text{SO}_4$

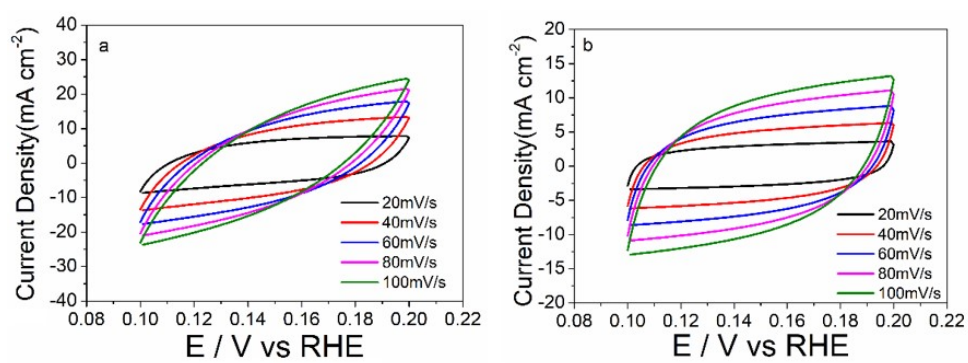

**Fig. S12** CV curves of Ru/HNC (a) in 1 M KOH, (b) in 0.5 M  $\text{H}_2\text{SO}_4$



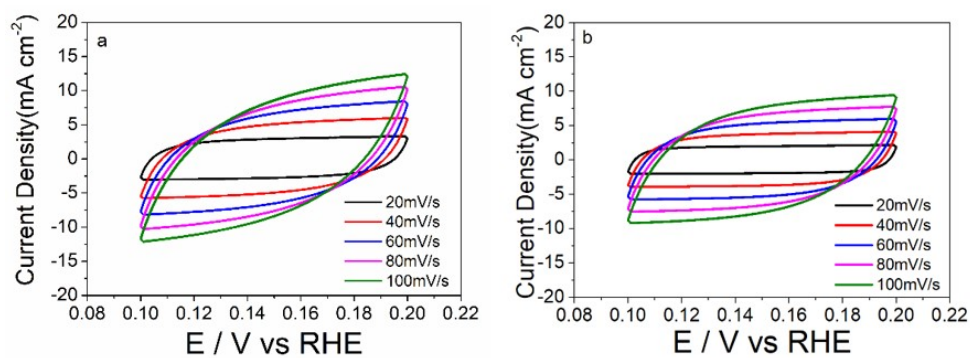

**Fig. S13** CV curves of Ru/NC (a) in 1 M KOH, (b) in 0.5 M H<sub>2</sub>SO<sub>4</sub>

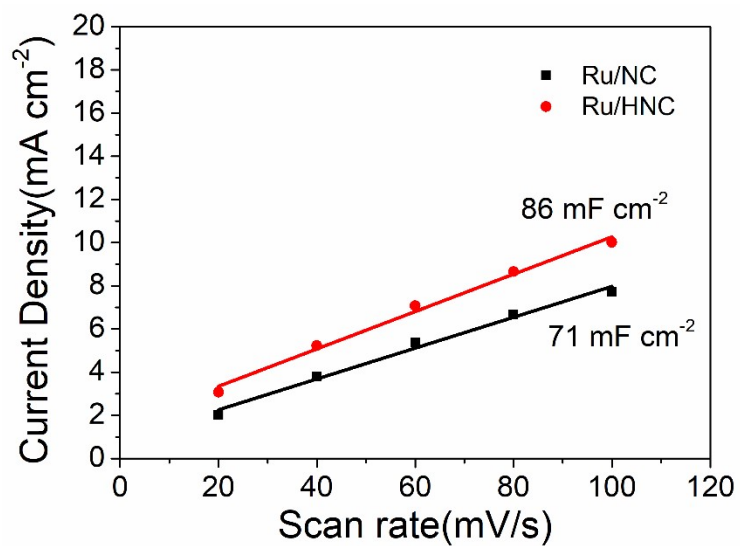

**Fig. S14** The linear slope of Ru/NC and Ru/HNC, equivalent to twice the double-layer capacitance, C<sub>dl</sub> was used to represent the rECSA in 0.5 M H<sub>2</sub>SO<sub>4</sub>



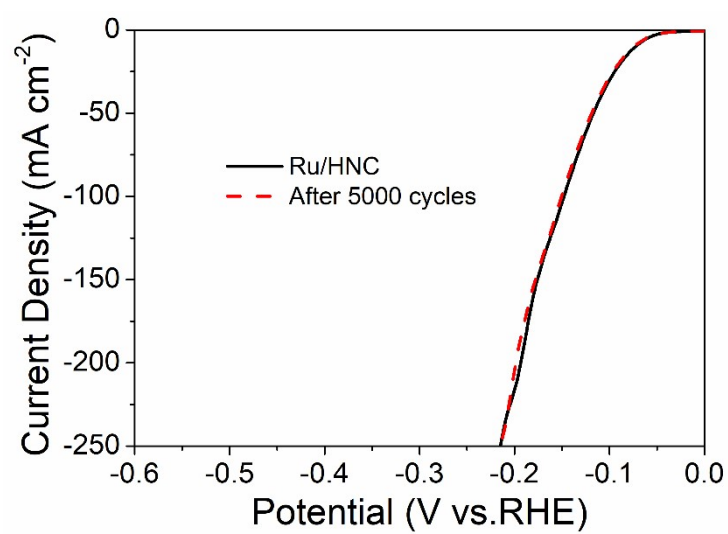

**Fig. S15** LSVs of Ru/HNC catalysts before and after 5000 CV cycles in 0.5 M H<sub>2</sub>SO<sub>4</sub>

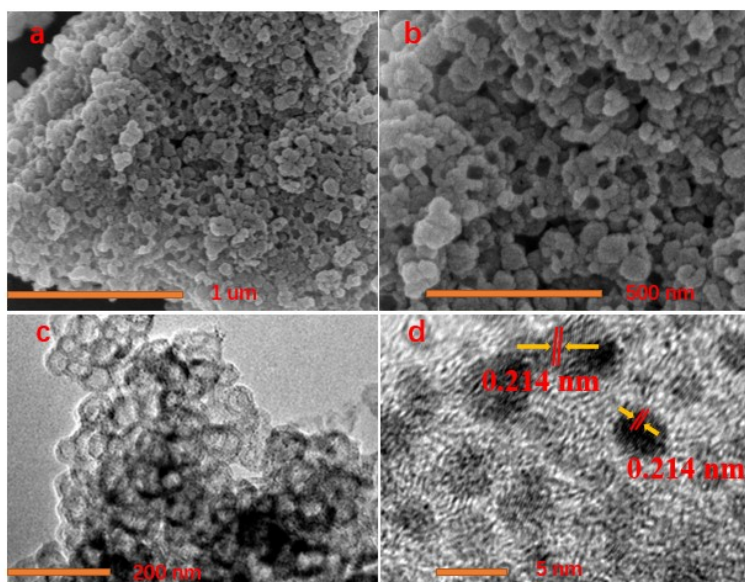

**Fig. S16** SEM (a,b) and TEM (c,d) of Ru/HNC after 5000 CV cycles

**Table S1.** Summary of HER catalytic activities of Ru/HNC and some other catalysts reported in recent literatures (1 M KOH).

| Catalysts                  | Overpotential                     | Tafel Slope<br>(mV dec <sup>-1</sup> ) | Ref.                                                |
|----------------------------|-----------------------------------|----------------------------------------|-----------------------------------------------------|
| Ru/HNC                     | 44 mV at 10 mA cm <sup>-2</sup>   | 72                                     | In this work                                        |
| Ru-CoP/NC                  | 22 mV at 10 mA cm <sup>-2</sup>   | 50                                     | ACS Appl. Mater. Interfaces, 2021, 13, 56035–56044. |
| ld-Ru@a-Co/Ti              | 33.5 mV at 10 mA cm <sup>-2</sup> | 39.6                                   | Chem. Commun., 2022, 58, 13588–13591.               |
| Ni <sub>2</sub> P–Ru/NF    | 40 mV at 10 mA cm <sup>-2</sup>   | 33.9                                   | Sustainable Energy Fuels, 2023, 7, 2830–2840.       |
| RuNP-RuSA@CFN-800          | 33 mV at 10 mA cm <sup>-2</sup>   | 37.1                                   | Adv. Funct. Mater. 2023, 33, 2213058                |
| Ru/PEI-XC                  | 13 mV at 10 mA cm <sup>-2</sup>   | 79.3                                   | J. Mater. Chem. A, 2021, 9, 22934–22942.            |
| Ru/TiOxNy NBs              | 16 mV at 10 mA cm <sup>-2</sup>   | 42                                     | J. Mater. Chem. A, 2022, 10, 11205–11212.           |
| Ru MNSs                    | 24 mV at 10 mA cm <sup>-2</sup>   | 33                                     | Angew. Chem. Int. Ed. Engl., 2022, e202116867.      |
| P-Ru-CoNi-LDH              | 29 mV at 10 mA cm <sup>-2</sup>   | 69                                     | Small, 2022, 18, e2104323.                          |
| CC@WS <sub>2</sub> /Ru-450 | 32.1 mV at 10 mA cm <sup>-2</sup> | 53.2                                   | Adv. Funct. Mater., 2022, 2109439.                  |
| Ru-HMT-MP-7                | 33 mV at 10 mA cm <sup>-2</sup>   | 26.4                                   | Small, 2022, e2105168.                              |
| Ru-NiCo <sub>2</sub> S     | 32 mV at 10 mA cm <sup>-2</sup>   | 41.3                                   | Adv. Funct. Mater., 2021, 2109731.                  |
| Ru/P-TiO <sub>2</sub>      | 27 mV at 10 mA cm <sup>-2</sup>   | 28.3                                   | Angew. Chem. Int. Ed. 2022, 61, e202212196          |
| Ru@NC                      | 39 mV at 10 mA cm <sup>-2</sup>   | 37.9                                   | ACS Sustainable Chem. Eng. 2022, 10, 15530–15537    |
| Ru@Co/N-CNTs-2             | 48 mV at 10 mA cm <sup>-2</sup>   | 33                                     | ACS Sustainable Chem. Eng., 2020, 8, 9136–9144.     |
| CoRu-O/A@HNC-2             | 85 mV at 10 mA cm <sup>-2</sup>   | 72.5                                   | ACS Appl. Mater. Interfaces, 2020, 12, 51437–51447. |
| Ru–OC60-300/KB             | 4.6 mV at 10 mA cm <sup>-2</sup>  | 24.7                                   | ACS Catal., 2023, 13, 7597–7605.                    |
| Ru/rGO-700                 | 26 mV at 10 mA cm <sup>-2</sup>   | 71                                     | Adv. Funct. Mater.,                                 |

|                              |                                 |      |                                             |
|------------------------------|---------------------------------|------|---------------------------------------------|
|                              |                                 |      | 2021, 31, 2100698.                          |
| Ru-CoP/CC-2                  | 45 mV at 10 mA cm <sup>-2</sup> | 98   | ChemElectroChem., 2022, 9, e202101482.      |
| Ru <sub>1</sub> CoP/CDs-1000 | 51 mV at 10 mA cm <sup>-2</sup> | 73.4 | Angew. Chem. Int. Ed., 2021, 60, 7234-7244. |
| Ru-CB[6]/rGO                 | 48 mV at 10 mA cm <sup>-2</sup> | 58.6 | Chem. Commun., 2020, 56, 9392-9395.         |
| M-Co@Ru/NC                   | 34 mV at 10 mA cm <sup>-2</sup> | 55   | Small., 2021, 17, e2105231.                 |

**Table S2.** Summary of HER catalytic activities of Ru/HNC and some other catalysts reported in recent literatures (0.5 M H<sub>2</sub>SO<sub>4</sub>).

| Catalysts                                     | Overpotential                         | Tafel Slope (mV dec <sup>-1</sup> ) | Ref.                                              |
|-----------------------------------------------|---------------------------------------|-------------------------------------|---------------------------------------------------|
| <b>Ru/HNC</b>                                 | <b>71 mV at 10 mA cm<sup>-2</sup></b> | <b>52</b>                           | <b>In this work</b>                               |
| Pt <sub>0.095</sub> -Ru <sub>2</sub> P@Ru/CNT | 27 mV at 10 mA cm <sup>-2</sup>       | 20                                  | ACS Sustainable Chem. Eng., 2021, 9, 15063–15071. |
| h-RuNS                                        | 154 mV at 10 mA cm <sup>-2</sup>      | 102                                 | ACS Appl. Nano Mater., 2021, 4, 8530-8538.        |
| Ru/CoxP@NC                                    | 165 mV at 10 mA cm <sup>-2</sup>      | 55                                  | ACS Sustainable Chem. Eng., 2019, 7, 9737-9742.   |
| Ru/Ni <sub>2</sub> P@NPC                      | 89 mV at 10 mA cm <sup>-2</sup>       | 62                                  | ACS Sustainable Chem. Eng., 2019, 7, 17714-17722. |
| Ru@Co/N-CNTs                                  | 92 mV at 10 mA cm <sup>-2</sup>       | 53                                  | ACS Sustainable Chem. Eng., 2020, 8, 9136–9144.   |
| Rh–Rh <sub>2</sub> P@C                        | 24 mV at 10 mA cm <sup>-2</sup>       | 36                                  | J. Mater. Chem. A, 2020, 8, 12378-12384.          |
| Pt <sub>1</sub> Ru <sub>1</sub> /NMHCS-A      | 22 mV at 10 mA cm <sup>-2</sup>       | 38                                  | ACS Catal., 2022, 12, 5540-5548.                  |
| Ru <sub>1</sub> CoP/CDs                       | 49 mV at 10 mA cm <sup>-2</sup>       | 52                                  | Angew. Chem. Int. Ed., 2021, 60, 7234-7244.       |
| RuSA-N-S-Ti <sub>3</sub> C <sub>2</sub> Tx    | 76 mV at 10 mA cm <sup>-2</sup>       | 90                                  | Adv. Mater., 2019, 31, 1903841.                   |

|                            |                                   |      |                                                     |
|----------------------------|-----------------------------------|------|-----------------------------------------------------|
| A-Pt                       | 18.8 mV at 10 mA cm <sup>-2</sup> | 27.8 | ACS Appl. Mater. Interfaces, 2021, 13, 44224–44233. |
| Ru-N/BC                    | 79 mV at 10 mA cm <sup>-2</sup>   | 62   | J. Mater. Chem. A, 2020, 8, 16669-16675.            |
| h-RuNP                     | 29 mV at 10 mA cm <sup>-2</sup>   | 33   | ACS Appl. Nano Mater., 2021, 4, 8530–8538.          |
| Ru/MoO <sub>2</sub>        | 107 mV at 10 mA cm <sup>-2</sup>  | 186  | ACS Appl. Nano Mater., 2023, 6, 13926–13934.        |
| Ru-CoP/NC                  | 98 mV at 10 mA cm <sup>-2</sup>   | 56   | ACS Appl. Mater. Interfaces, 2021, 13, 56035–56044. |
| Ru@Co/N-CNTs-2             | 92 mV at 10 mA cm <sup>-2</sup>   | 45   | ACS Sustainable Chem. Eng., 2020, 8, 9136–9144.     |
| Ru/RuS <sub>2</sub>        | 45 mV at 10 mA cm <sup>-2</sup>   | /    | Angew. Chem., 2021, 133, 12436.                     |
| Ru/Ni <sub>2</sub> P       | 89 mV at 10 mA cm <sup>-2</sup>   | 62   | ACS Sustainable Chem. Eng., 2019, 7, 17714-17722.   |
| 2D-MoO <sub>2</sub> /Ru/NC | 68 mV at 10 mA cm <sup>-2</sup>   | 46   | J. Phys. Chem. C, 2020, 124, 10804-10814.           |
| Ru-Cu-MoO <sub>2</sub>     | 48 mV at 10 mA cm <sup>-2</sup>   | 69   | J. Mater. Chem. A, 2022, 10, 12341-12349.           |
